# Supplementary material
Source: PubMed Central journal article supplement (PMC3271270)

A

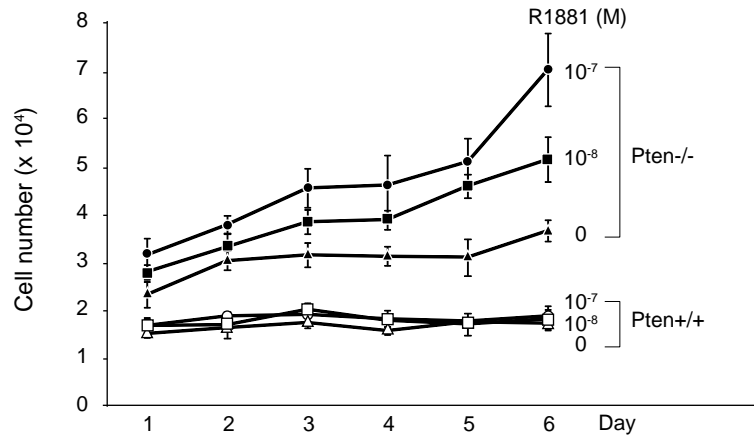

B

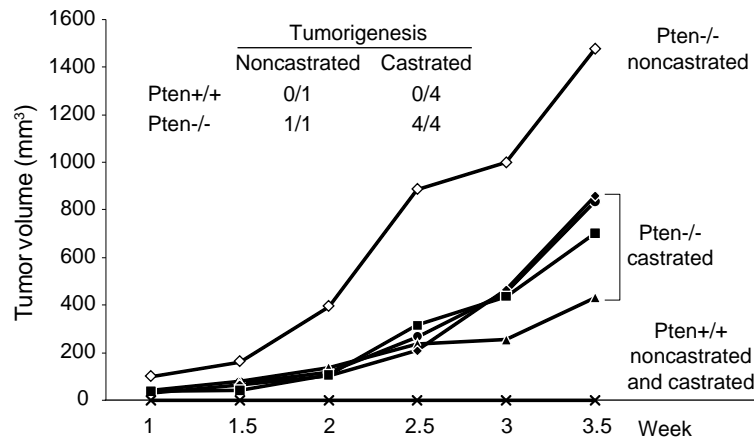

Figure S1

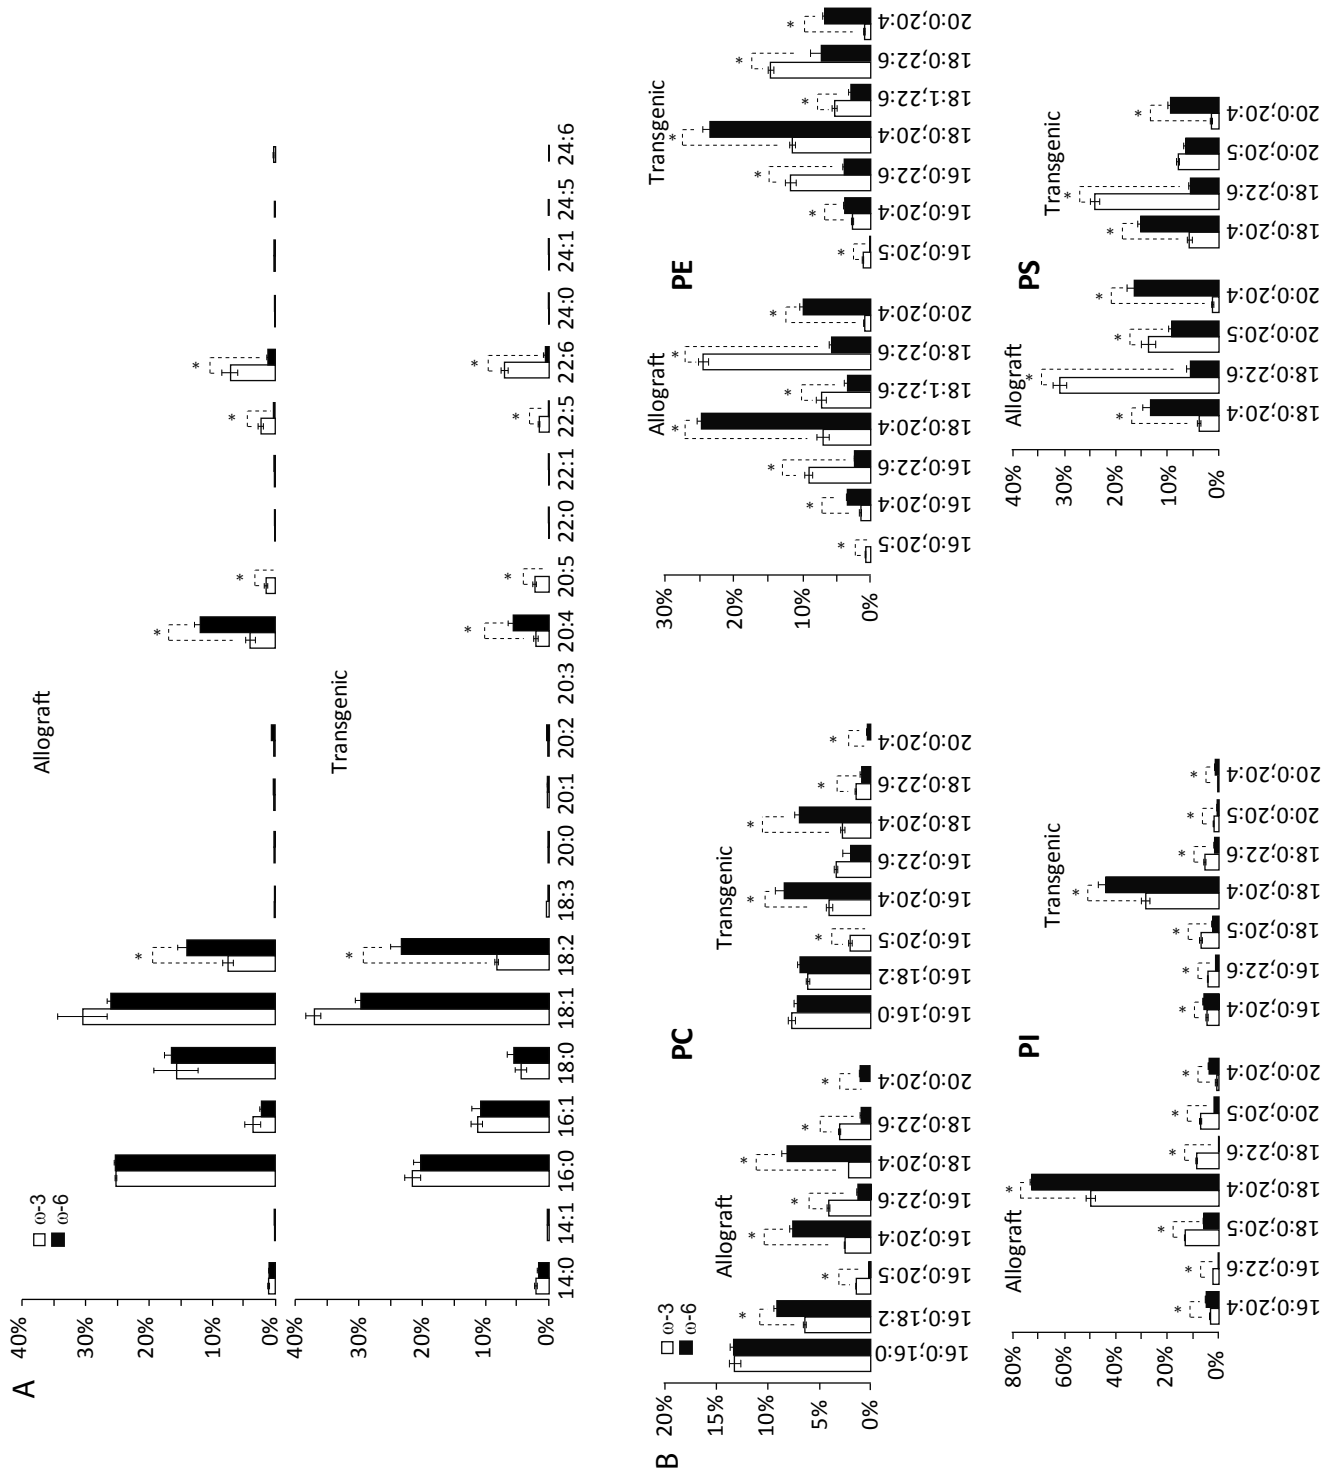

Figure S2

Supplement: supp_bgr290_Figure_S1-2.pdf [file supp_bgr290_Figure_S1-2.pdf]
